# Supplementary material for: Effect of Different Pig Fecal Microbiota Transplantation on Mice Intestinal Function and Microbiota Changes During Cold Exposure
Source: Frontiers journal article supplement (doi:10.3389/fvets.2022.805815), 2022-04-13
Supplement: Data_Sheet_1.pdf [file Data_Sheet_1.pdf]

Table S1 Quantitative primer sequence

|                | F                     | R                           |
|----------------|-----------------------|-----------------------------|
| UCP1           | CCGAAACTGTACAGCGGTCT  | CCGAGAGAGGCAGGTGTTTC        |
| Cpt1b          | AATAAACCCCAGGATGGCGG  | GGAGACGGACACAGATAGCC        |
| Pgl-1 $\alpha$ | GTGAAGAGATCAAGCCGGTCA | GTGTCCTGTCTCCGTGTAGC        |
| IL-15          | CAGAGGCCAACTGGATAGATG | ACTGTCAGTGTATAAAGTGGTGTCAAT |
| Zo-1           | CGACAGTAGAACACGCTAT   | AGAGGAAGGTATCAGAGGAG        |
| IL-1           | CATTCTGTCTCGAGCCCACC  | GCTGGAAGTCTCTTGCGGAG        |
| IL-10          | ACTGCTAACCGACTCCTT    | TCCACTGCCTTGCTCTTA          |

Table S2 Hematological values of mice during cold exposure

|                                                | Ctrl                | MSt                 | DLYt                |
|------------------------------------------------|---------------------|---------------------|---------------------|
| Leukocyte( $10^9/L$ )                          | 5.57 $\pm$ 0.294a   | 4.017 $\pm$ 0.941b  | 3.84 $\pm$ 0.472b   |
| Lymphocyte ratio (%)                           | 71.3667 $\pm$ 8.259 | 70.35 $\pm$ 5.59    | 63.25 $\pm$ 8.52    |
| Intermediate cell ratio (%)                    | 5.85 $\pm$ 1.421    | 5.55 $\pm$ 0.709    | 4.83 $\pm$ 0.907    |
| Granulocyte ratio (%)                          | 21.78 $\pm$ 7.199   | 24.65 $\pm$ 4.528   | 31.3 $\pm$ 9.981    |
| Total number of red blood cells( $10^{12}/L$ ) | 6.3467 $\pm$ 0.726  | 6.825 $\pm$ 0.254   | 6.955 $\pm$ 0.526   |
| Hemoglobin(g/L)                                | 129 $\pm$ 19.959    | 141.166 $\pm$ 5.528 | 140.66 $\pm$ 11.254 |
| Hematocrit (fL)                                | 34.933 $\pm$ 4.115  | 37.66 $\pm$ 1.779   | 38.26 $\pm$ 2.941   |
| Total number of platelets( $10^9/L$ )          | 543.6667 $\pm$ 5.65 | 548.833 $\pm$ 4.418 | 538 $\pm$ 7.249     |
| Mean platelet volume (fL)                      | 7.05 $\pm$ 0.378    | 7.5333 $\pm$ 0.307  | 7.7 $\pm$ 0.876     |

Data are presented as means with their standard errors of the mean; n = 7 per group. Comparisons were conducted using one-way ANOVA test.

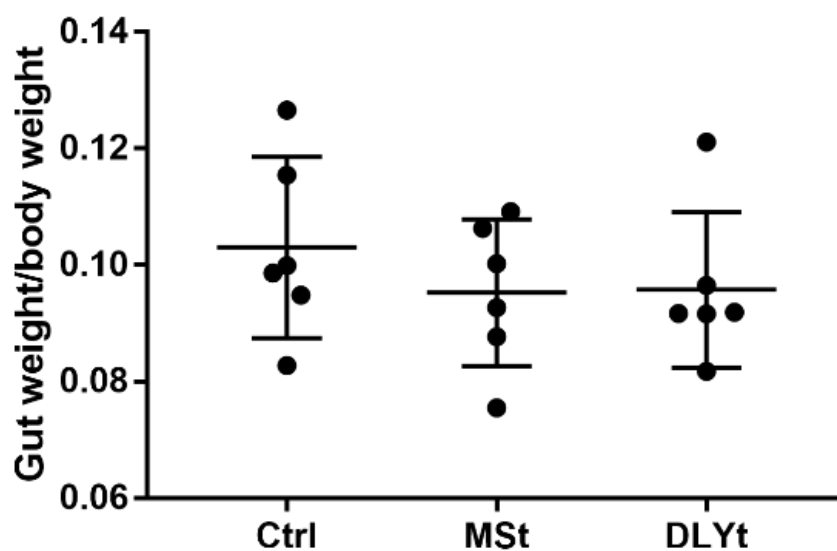

Figure S1 Gut weight/ body weight rate (n=7/group) in FMT and Ctrl mice during cold exposure.

Table S3 Hematological values of mice during cold exposure

|      | villus length ( $\mu\text{m}$ ) |                     | recesses depth ( $\mu\text{m}$ ) |                    | V/C              |                 |
|------|---------------------------------|---------------------|----------------------------------|--------------------|------------------|-----------------|
|      | jejunum                         | ileum               | jejunum                          | ileum              | jejunum          | ileum           |
| Ctrl | 411.38 $\pm$ 13.11a             | 184.24 $\pm$ 18.83a | 103.13 $\pm$ 12.10b              | 76.846 $\pm$ 10.23 | 4.26 $\pm$ 0.65a | 2.23 $\pm$ 0.34 |
| MSt  | 232.19 $\pm$ 16.92b             | 145.53 $\pm$ 27.07b | 124.74 $\pm$ 16.92a              | 74.988 $\pm$ 11.46 | 2.53 $\pm$ 0.67b | 1.98 $\pm$ 0.65 |
| DLYt | 298.88 $\pm$ 20.78b             | 156.67 $\pm$ 12.06b | 104.54 $\pm$ 6.84b               | 79.205 $\pm$ 9.82  | 2.90 $\pm$ 0.34b | 2.02 $\pm$ 0.27 |

Data are presented as means with their standard errors of the mean; n = 7 per group.

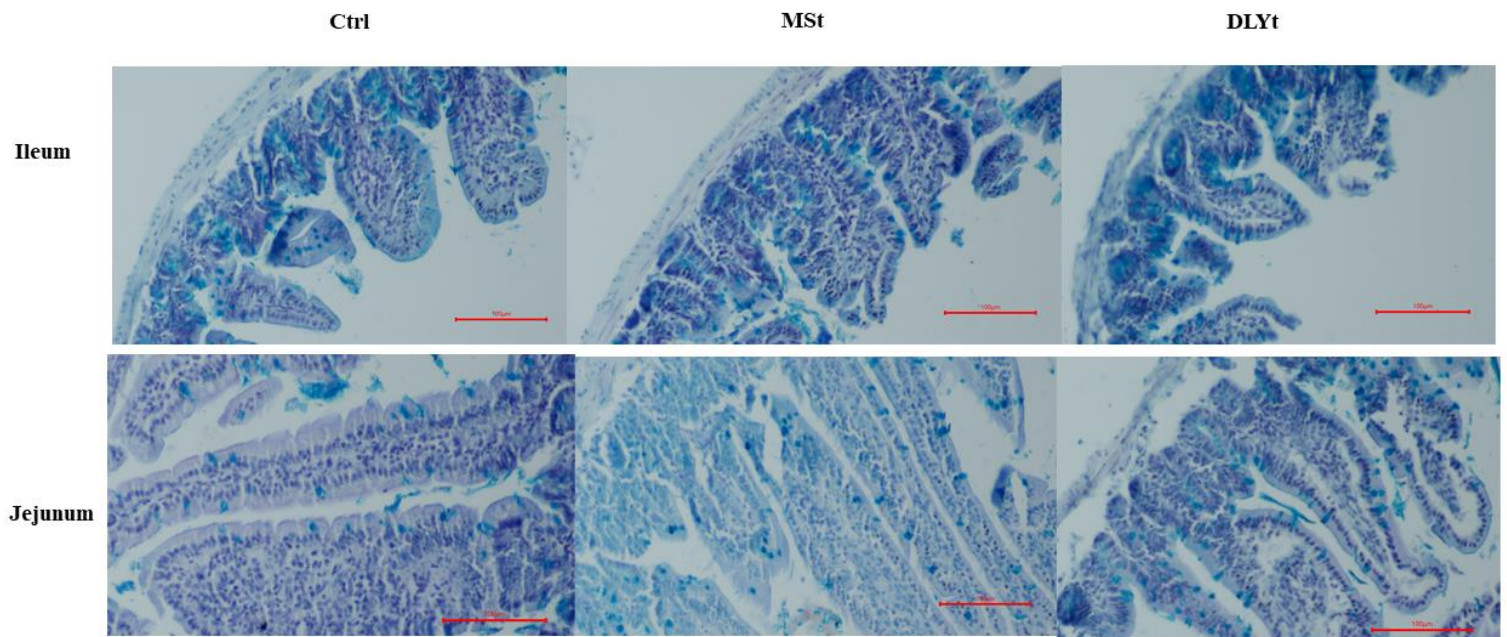

Figure S2 The ileum intestinal tissue AB\_PAS stained sections of Control group , MSt group and DLYt group (n=7/group). The jejunum intestinal tissue AB\_PAS stained sections of control group, MSt group and DLYt group (n=7/group).

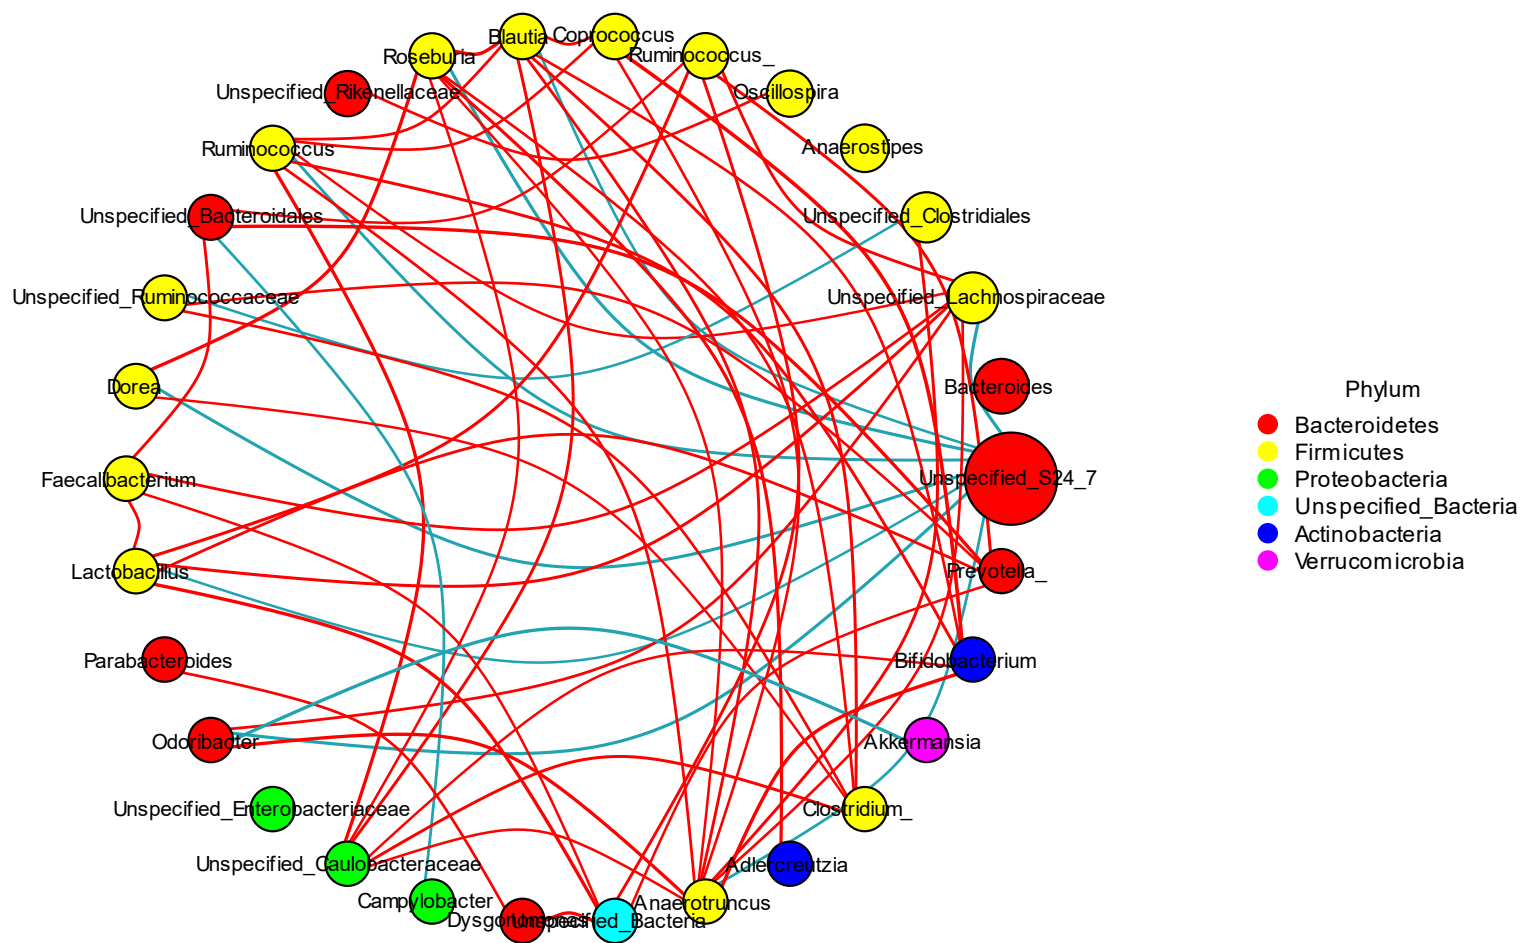

Figure S3 Genus classification level species interaction network diagram.

Comparison of the interaction network diagrams of the enriched species in the sample group. The circle represents a species, the size represents its relative abundance, the different colors represent different species phyla classifications, and the lines between the circles represent the two species.

The correlation is significant ( $P < 0.05$ ), the line color red represents positive correlation, blue represents negative correlation, the thicker the line, the greater the absolute value of the correlation coefficient.
